# Supplementary material
Source: Elsevier journal article supplement (https://git.physik.uzh.ch/gitbucket/mchrzasz/Lecture_repo/raw/b2263b3733e231b6108f820fc2736525ddc7fad1/Lectures_others/MC/W_Placzek_2010/mmc10.pdf)
Supplement: mmc10 [file mmc10.pdf]

# Dalsze kwestie rozwiązywania równań różniczkowych cząstkowych metodami błędzenia przypadkowego

- **Oczekiwany czas błędzenia w zagadnieniu Dirichleta dla równania Laplace'a.**
- **Metody rozwiązywania równań różniczkowych cząstkowych przez sprowadzanie ich do układów równań liniowych.**
- **Metoda błędzenia przypadkowego ze zmienną długością kroku.**
- **Drugie i trzecie zagadnienie brzegowe dla równania Laplace'a.**

## Zagadnienie Dirichleta dla równania Laplace'a

Znaleźć wartości funkcji  $u(x_1, x_2, \dots, x_k)$  spełniającej równanie Laplace'a:

$$\frac{\partial^2 u}{\partial x_1^2} + \frac{\partial^2 u}{\partial x_2^2} + \dots + \frac{\partial^2 u}{\partial x_k^2} = 0, \quad (x_1, x_2, \dots, x_k) \in D \subset \mathbb{R}^k, \quad (1)$$

wewnątrz obszaru  $D$ , jeżeli na brzegu  $\Gamma(D)$  tego obszaru przyjmuje ona wartości dane funkcją  $f$ :

$$u(x_1, x_2, \dots, x_k) = f(x_1, x_2, \dots, x_k), \quad (x_1, x_2, \dots, x_k) \in \Gamma(D). \quad (2)$$

► Niech obszar  $D$  będzie wyznaczony przez układ nierówności:

$$0 \leq \sum_{i=1}^k x_i^2 \leq r^2, \quad r = \text{const.}$$

▷ Oznaczmy:  $\pi_\nu(x_1, x_2, \dots, x_k)$  – prawdopodobieństwo, że cząsteczka  $X$  startując z punktu  $(x_1, x_2, \dots, x_k)$  dojdzie do brzegu obszaru w  $\nu$  krokach;

$\kappa(x_1, x_2, \dots, x_k)$  – oczekiwana liczba kroków w takiej trajektorii.

$$\pi_0(x_1, x_2, \dots, x_k) = \begin{cases} 1, & (x_1, x_2, \dots, x_k) \in \Gamma(D), \\ 0, & (x_1, x_2, \dots, x_k) \in D \end{cases}$$

$$\pi_\nu(x_1, x_2, \dots, x_k) = \frac{1}{2k} \sum' \pi_{\nu-1}(x'_1, x'_2, \dots, x'_k),$$

gdzie  $\sum'$  oznacza sumowanie po wszystkich punktach sąsiednich punktu  $(x_1, x_2, \dots, x_k)$ .

Na podstawie ostatniego wzoru, dla oczekiwanej liczby kroków:

$$\kappa(x_1, x_2, \dots, x_k) = \sum_{\nu=1}^{\infty} \nu \pi_{\nu}(x_1, x_2, \dots, x_k)$$

dostajemy:

$$\begin{aligned} \kappa(x_1, x_2, \dots, x_k) &= \frac{1}{2k} \sum_{\nu=1}^{\infty} \left[ \nu \sum' \pi_{\nu-1}(x'_1, x'_2, \dots, x'_k) \right] \\ &= \frac{1}{2k} \sum_{\nu=1}^{\infty} \left[ (\nu - 1) \sum' \pi_{\nu-1}(x'_1, x'_2, \dots, x'_k) \right] + \frac{1}{2k} \sum_{\nu=1}^{\infty} \sum' \pi_{\nu-1}(x'_1, x'_2, \dots, x'_k). \end{aligned}$$

▷ Skąd otrzymujemy:

$$\kappa(x_1, x_2, \dots, x_k) = \frac{1}{2k} \sum' \kappa(x'_1, x'_2, \dots, x'_k) + 1.$$

► Powyższe równanie jest różnicowym odpowiednikiem **równania różniczkowego Poissona**:

$$\frac{\partial^2 \kappa}{\partial x_1^2} + \frac{\partial^2 \kappa}{\partial x_2^2} + \dots + \frac{\partial^2 \kappa}{\partial x_k^2} = -2k, \quad (x_1, x_2, \dots, x_k) \in D,$$

z warunkami brzegowymi:

$$\kappa(x_1, x_2, \dots, x_k) = 0, \quad (x_1, x_2, \dots, x_k) \in \Gamma(D).$$

Podstawiając w poprzednim równaniu:

$$\kappa(x_1, x_2, \dots, x_k) = \psi(x_1, x_2, \dots, x_k) - \sum_{i=1}^k x_i^2$$

otrzymujemy dla funkcji  $\psi$  równanie Laplace'a:

$$\frac{\partial^2 \psi}{\partial x_1^2} + \frac{\partial^2 \psi}{\partial x_2^2} + \dots + \frac{\partial^2 \psi}{\partial x_k^2} = 0.$$

▷ Ponieważ na brzegu obszaru  $\Gamma(D)$ :

$$\psi(x_1, x_2, \dots, x_k) = r^2 = \text{const},$$

to również dla wszystkich punktów obszaru  $D$ :

$$\psi(x_1, x_2, \dots, x_k) = r^2.$$

► Skąd wynika oszacowanie na oczekiwaną liczbę kroków (czas błędzenia przypadkowego):

$$\kappa(x_1, x_2, \dots, x_k) = r^2 - \sum_{i=1}^k x_i^2 \leq r^2.$$

### Wniosek:

**Oczekiwana liczba kroków (oczekiwany czas błędzenia przypadkowego) cząsteczki  $X$  od punktu  $(x_1, x_2, \dots, x_k)$  do brzegu obszaru może być oszacowana przez liczbę  $r$  (liniowy rozmiar obszaru) niezależnie od liczby wymiarów  $k$  (liczby zmiennych w równaniu).**

## Zagadnienie Dirichleta w postaci dyskretnej w dwóch wymiarach:

$$u(x, y) = \frac{1}{4} [u(x-1, y) + u(x+1, y) + u(x, y-1) + u(x, y+1)], \quad (x, y) \in D, \quad (3)$$

$$u(x, y) = f(x, y), \quad (x, y) \in \Gamma(D), \quad (4)$$

- ▷ Numerując w dowolnym porządku wszystkie punkty  $(x, y) \in D \cup \Gamma(D)$ , powyższe równania możemy przestawić w postaci **układu równań liniowych**:

$$u_i = a_i + \sum_{j=1}^n h_{ij} u_j, \quad i = 1, 2, \dots, n.$$

- **Zatem do rozwiązywania równań różniczkowych cząstkowych (typu zagadnienia Dirichleta) możemy stosować metody rozwiązywania układów równań liniowych (np. metody von Neumanna–Ulama, metody Wasowa itd.).**

# Zagadnienie Dirichleta jako układ równań liniowych – przykład 6

- Schemat różnicowy pewnego zagadnienia Dirichleta przedstawia rysunek obok: punkty wewnętrzne obszaru oznaczone są **kółkami**, a punkty brzegowe – **gwiazdkami**.
- Punkty wewnętrzne  $P_i$  oraz punkty brzegowe  $Q_i$  numerujemy niezależnie.
- Niech:  $u_i$  – wartość funkcji w punkcie wewnętrznym,  
 $f_i$  – wartość funkcji w punkcie brzegowym.
- Dla każdego punktu wewnętrznego  $P_i$  piszemy równanie Laplace'a w postaci (3):

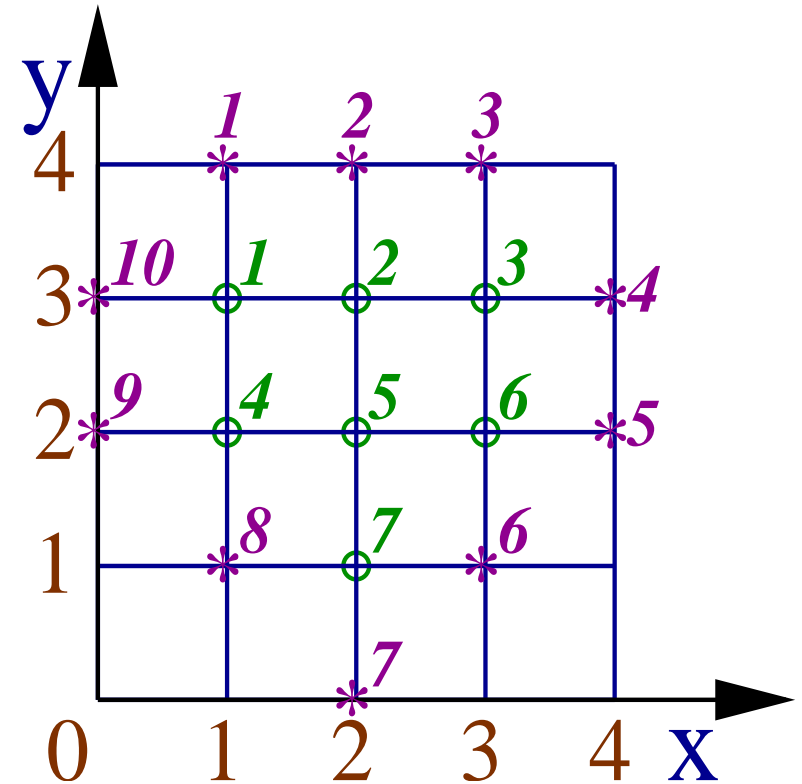

$$\left\{ \begin{array}{l}
 u_1 \quad - u_2/4 \quad \quad \quad - u_4/4 \quad \quad \quad \quad \quad = (f_1 + f_{10})/4 \\
 -u_1/4 \quad + u_2 \quad - u_3/4 \quad \quad \quad - u_5/4 \quad \quad \quad = f_2/4 \\
 \quad \quad - u_2/4 \quad \quad \quad + u_3 \quad \quad \quad - u_6/4 \quad \quad \quad = (f_3 + f_4)/4 \\
 - u_1/4 \quad \quad \quad + u_4 \quad - u_5/4 \quad \quad \quad = (f_8 + f_9)/4 \\
 \quad \quad - u_2/4 \quad \quad - u_4/4 \quad + u_5 \quad - u_6/4 \quad - u_7/4 \quad = 0 \\
 \quad \quad \quad \quad - u_3/4 \quad \quad \quad - u_5/4 \quad + u_6 \quad \quad \quad = (f_5 + f_6)/4 \\
 \quad \quad \quad \quad \quad \quad \quad - u_5/4 \quad \quad \quad + u_7 \quad \quad \quad = (f_6 + f_7 + f_8)/4
 \end{array} \right.$$

# Zagadnienie Dirichleta jako układ równań liniowych – przykład 7

Powyższy układ równań można przekształcić do postaci iteracyjnej:

$$\vec{u} = \vec{a} + \mathbf{H} \vec{u},$$

gdzie  $\vec{u} = (u_1, u_2, \dots, u_7)$  jest wektorem wartości funkcji w punktach wewnętrznych obszaru  $D$ ,  $\vec{a}$  jest kolumną wyrazów wolnych (kombinacje liniowe wartości funkcji na brzegu obszaru), natomiast

$\mathbf{H}$  jest macierzą:

$$\mathbf{H} = \begin{bmatrix} 0 & \frac{1}{4} & 0 & \frac{1}{4} & 0 & 0 & 0 \\ \frac{1}{4} & 0 & \frac{1}{4} & 0 & \frac{1}{4} & 0 & 0 \\ 0 & \frac{1}{4} & 0 & 0 & 0 & \frac{1}{4} & 0 \\ \frac{1}{4} & 0 & 0 & 0 & \frac{1}{4} & 0 & 0 \\ 0 & \frac{1}{4} & 0 & \frac{1}{4} & 0 & \frac{1}{4} & \frac{1}{4} \\ 0 & 0 & \frac{1}{4} & 0 & \frac{1}{4} & 0 & 0 \\ 0 & 0 & 0 & 0 & \frac{1}{4} & 0 & 0 \end{bmatrix}.$$

- ▶ Do znalezienia rozwiązania  $\vec{u} = (u_1, u_2, \dots, u_7)$ , tzn. obliczenia wartości funkcji  $u$  w punktach wewnętrznych obszaru  $D$ , można zastosować metody rozwiązywania układów równań liniowych opartych o błądzenie przypadkowe: von Neumanna–Ulama, Wasowa itd.
- ▷ Dzięki specyficznym własnościom macierzy  $\mathbf{H}$  dla zagadnienia Dirichleta, takim jak jednakowe prawdopodobieństwa przejść do punktów sąsiednich, powyższe metody rozwiązywania układów równań liniowych można w tym przypadku nieco uprościć.

## Metoda podstawowa von Neumanna–Ulama:

1. Cząsteczkę  $X$  umieszczamy w punkcie  $(x, y)$ .
  2. Obserwujemy błędzenie przypadkowe tej cząsteczki (przejścia do sąsiednich punktów z równymi prawdopodobieństwami) do chwili, w której osiągnie ona brzeg obszaru.  
Niech  $P_k$  oznacza ostatni punkt obserwowanej trajektorii należący do **wnętrza** obszaru.
  3. Zaobserwowanej trajektorii przypisujemy wartość  $v$  równą średniej arytmetycznej wartości funkcji  $u$  na wszystkich **punktach brzegowych** sąsiadujących z punktem  $P_k$ .
- ▶ Kroki 1–3 powtarzamy  $n$  razy.
  - ▶ Za oszacowanie wartości funkcji w punkcie  $(x, y)$  przyjmujemy średnią arytmetyczną wartości  $v$  dla wszystkich zaobserwowanych trajektorii.
  - ▷ Przykładowe rozwiązanie w punkcie  $(2, 2)$  dla 20 trajektorii:

$$u(2, 2) = 1.0500 \pm 0.2756 .$$

⇒ **Ćw. N12.1:** Używając metody podstawowej von Neumanna–Ulama dla układów równań liniowych rozwiązać powyższe zagadnienie Dirichleta dla przykładowych wartości funkcji w punktach brzegowych obszaru  $D$ .



## Metoda dualna Wasowa:

1. Losujemy punkt brzegowy  $Q$  według pewnego (dowolnego) rozkładu prawdopodobieństwa  $p(Q)$  i umieszczamy w nim cząsteczkę  $X$ .
2. Z jednakowym prawdopodobieństwem losujemy przejście cząsteczki z punktu  $Q$  do jednego z **sąsiednich** punktów **wewnętrznych**.
3. Z jednakowymi prawdopodobieństwami losujemy przejścia cząsteczki do kolejnych punktów i obserwujemy jej trajektorię do momentu osiągnięcia przez nią brzegu w pewnym punkcie  $Q'$ .
4. Zliczamy liczbę  $N(x_1, x_2, \dots, x_k)$  przejść cząsteczki  $X$  przez określony punkt wewnętrzny  $(x_1, x_2, \dots, x_k)$ .
5. Dla każdego punktu wewnętrznego  $(x_1, x_2, \dots, x_k)$  obliczamy wartość:

$$w(x_1, x_2, \dots, x_k) = \frac{1}{2k} N(x_1, x_2, \dots, x_k) \frac{f(Q)}{p(Q)}.$$

► Kroki 1–4 powtarzamy  $n$  razy.

► Za oszacowanie wartości funkcji we wszystkich punktach obszaru  $D$  przyjmujemy średnie arytmetyczne powyższych wartości  $w$  w tych punktach.

⇒ **Ćw. N4\***: Do przykładu z poprzedniego ćwiczenia zastosować metodę dualną Wasowa z równomiernym rozkładem prawdopodobieństwa  $p(Q)$ . Porównać zbieżność tej metody z metodą poprzednią.

Niech:  $u(x, y)$  – funkcja harmoniczna (spełnia równanie Laplace'a) dwóch zmiennych;

$S_r(x, y)$  – okrąg o promieniu  $r$  i środku w punkcie  $(x, y)$ .

⇒ Wartość funkcji  $u$  w punkcie  $(x, y)$  jest średnią wartości tej funkcji na okręgu  $S_r(x, y)$ :

$$u(x, y) = \frac{1}{2\pi} \int_0^{2\pi} u(x + r \cos \phi, y + r \sin \phi) d\phi.$$

▷ Jest to prawdziwe dla funkcji harmonicznych dowolnej liczby zmiennych:  $x_1, x_2, \dots, x_k$ .

## Metoda M. E. Mullera:

1. W chwili początkowej cząsteczka  $X$  znajduje się w punkcie  $(x_1, x_2, \dots, x_k)$ .
  2. Konstruujemy  $k$ -wymiarową sferę o środku w punkcie, w którym aktualnie znajduje się cząsteczka, całkowicie zawartą w obszarze  $D$  i losujemy punkt  $(x'_1, x'_2, \dots, x'_k)$  według rozkładu równomiernego na skonstruowanej sferze. Punkt ten traktujemy jako nowe położenie cząsteczki  $X$ .
  3. Błędzenie cząsteczki kończymy w chwili, gdy osiągnie ona brzeg  $\Gamma(D)$ . Tak zaobserwowanej trajektorii przypisujemy wartość funkcji w tym punkcie brzegowym.
- ▶ Kroki 1–3 powtarzamy  $n$  razy.
  - ▶ Oszacowaniem wartości funkcji w punkcie  $(x_1, x_2, \dots, x_k)$  jest średnia arytmetyczna powyższych wartości dla wszystkich zaobserwowanych trajektorii.

# Metoda błędzenia przypadkowego ze zmienną długością kroku 11

- ▶ Najbardziej efektywny sposób rozwiązania otrzymamy wtedy, gdy cząsteczka możliwie jak najszybciej osiągnie brzeg.
- ▷ Ponieważ promień konstruowanej sfery może być dowolny, więc najlepiej wybierać go tak, aby na każdym etapie obliczeń konstruować możliwie największą sferę, jaka jeszcze mieści się w obszarze  $D$ .

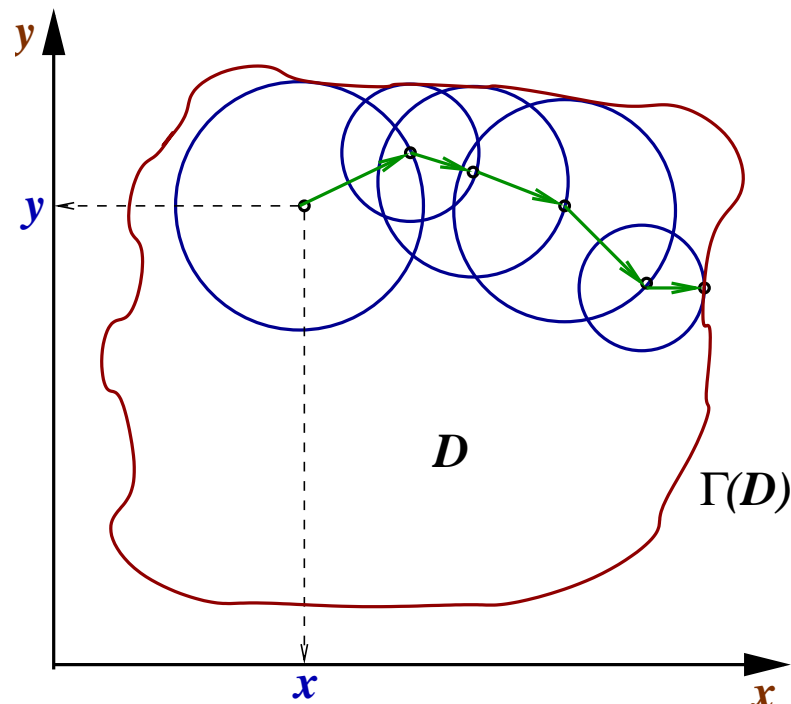

Przykładowa trajektoria punktu  $X$  błędzącego ze zmienną długością kroku.

- **Problem:**  
Sfera styka się z brzegiem obszaru w jednym punkcie!  
⇒ Prawdopodobieństwo wylosowania takiego punktu wynosi zero!
- ▶ **Rozwiązanie:**  
Uznaje się, że cząsteczka osiągnęła brzeg, gdy jej odległość od brzegu nie przekracza ustalonej małej liczby  $\delta$ .  
▷ Liczba  $\delta$  może być tak dobrana, żeby błąd oszacowania wartości funkcji w danym punkcie nie przekraczał ustalonej liczby  $\epsilon$ .

Przykładowe wyniki rozwiązania równania Laplace'a na kwadracie ( $0 \leq x \leq 1$ ,  $0 \leq y \leq 1$ ) z warunkami brzegowymi:  $u(0, y) = 1$ ,  $u(1, y) = u(x, 0) = u(x, 1) = 0$ .

| Metoda                      | Punkt |     | Liczba trajektorii | Średnia liczba kroków w jednej trajektorii | Czas obliczeń (s) | Rozwiązanie |          |
|-----------------------------|-------|-----|--------------------|--------------------------------------------|-------------------|-------------|----------|
|                             | $x$   | $y$ |                    |                                            |                   | Monte Carlo | dokładne |
| Stały krok<br>$h = 0.05$    | 0.3   | 0.3 | 2000               | 89.87                                      | 42.0              | 0.396       | 0.4028   |
|                             |       |     | 4000               | 88.76                                      | 83.0              | 0.399       |          |
|                             | 0.5   | 0.1 | 2000               | 46.05                                      | 21.5              | 0.075       | 0.0816   |
|                             |       |     | 4000               | 46.83                                      | 43.8              | 0.078       |          |
|                             | 0.5   | 0.5 | 2000               | 115.83                                     | 54.1              | 0.247       | 0.2500   |
|                             |       |     | 4000               | 117.26                                     | 109.6             | 0.248       |          |
| Zmienna<br>długość<br>kroku | 0.3   | 0.3 | 2000               | 6.06                                       | 17.9              | 0.398       | 0.4028   |
|                             |       |     | 4000               | 6.06                                       | 35.8              | 0.395       |          |
|                             | 0.5   | 0.1 | 2000               | 6.04                                       | 18.0              | 0.078       | 0.0816   |
|                             |       |     | 4000               | 6.16                                       | 36.7              | 0.080       |          |
|                             | 0.5   | 0.5 | 2000               | 5.07                                       | 14.5              | 0.255       | 0.2500   |
|                             |       |     | 4000               | 5.02                                       | 28.8              | 0.252       |          |

Znaleźć wartości funkcji  $u(x_1, x_2, \dots, x_k)$  spełniającej równanie Laplace'a:

$$\frac{\partial^2 u}{\partial x_1^2} + \frac{\partial^2 u}{\partial x_2^2} + \dots + \frac{\partial^2 u}{\partial x_k^2} = 0, \quad (x_1, x_2, \dots, x_k) \in D \subset \mathbb{R}^k, \quad (5)$$

wewnątrz obszaru  $D$ , jeżeli na brzegu  $\Gamma(D)$  tego obszaru spełnia ona następujący warunek:

$$f(x_1, x_2, \dots, x_k) \frac{\partial u(x_1, x_2, \dots, x_k)}{\partial n} + g(x_1, x_2, \dots, x_k) u(x_1, x_2, \dots, x_k) = h(x_1, x_2, \dots, x_k), \quad (6)$$

gdzie  $\partial u / \partial n$  jest pochodną funkcji  $u$  wzdłuż normalnej do brzegu  $\Gamma(D)$  w kierunku wnętrza obszaru  $D$ .

Możliwe przypadki:

- $f \equiv 0 \rightarrow$  zagadnienie Dirichleta.
- $g \equiv 0 \rightarrow$  zagadnienie Neumanna (drugie zagadnienie brzegowe).
- Ogólny przypadek  $\rightarrow$  trzecie zagadnienie brzegowe (zagadnienie mieszane).

Rozważymy przypadek  $k = 2$  (uogólnienie na dowolne  $k$  jest proste).

► Równanie Laplace'a:

$$\frac{\partial^2 u(x, y)}{\partial x^2} + \frac{\partial^2 u(x, y)}{\partial y^2} = 0, \quad (x, y) \in D \subset \mathbb{R}^2. \quad (7)$$

► Warunek brzegowy:

$$f(x, y) \frac{\partial u(x, y)}{\partial n} + g(x, y) u(x, y) = h(x, y), \quad (x, y) \in \Gamma(D). \quad (8)$$

⇒ Równanie różnicowe dla punktu wewnętrznego  $(x, y)$ :

$$u(x, y) = \frac{1}{4} [u(x - h, y) + u(x + h, y) + u(x, y - h) + u(x, y + h)].$$

● Reguła błędzenia przypadkowego dla punktów wewnętrznych:

Jeżeli w chwili  $t$  cząsteczka znajduje się w punkcie wewnętrznym  $(x, y)$ , to w chwili  $(t + 1)$  znajdzie się z jednakowym prawdopodobieństwem w jednym z punktów sąsiednich:  $(x - h, y)$ ,  $(x + h, y)$ ,  $(x, y - h)$ ,  $(x, y + h)$ .

## Reguły błędzenia przypadkowego dla punktów zewnętrznych:

- Punkt brzegowy  $Q$  sąsiaduje tylko z jednym punktem wewnętrznym  $P$

▷ Warunek brzegowy, gdy normalna do brzegu w punkcie  $Q$  jest równoległa do krawędzi siatki:

$$f(Q) \frac{u(P) - u(Q)}{h} + g(Q) u(Q) = h(Q).$$

Rozwiązując powyższe równanie względem  $u(Q)$  dostajemy:

$$u(Q) = \frac{f(Q) u(P)}{f(Q) - h g(Q)} - h \frac{h(Q)}{f(Q) - h g(Q)}.$$

▷ Wprowadźmy oznaczenia:

$$\phi(Q) = \frac{f(Q)}{p[f(Q) - h g(Q)]}, \quad \psi(Q) = -h \frac{h(Q)}{(1-p)[f(Q) - h g(Q)]},$$

gdzie  $p$  dowolny ułamek dodatni:  $0 < p < 1$ .

▶ Zatem:

$$u(Q) = p \phi(Q) u(P) + (1-p) \psi(Q).$$

Tzn.  $u(Q)$  może być interpretowane jako wartość oczekiwana zmiennej losowej, która z prawdopodobieństwem  $p$  przyjmuje wartość  $u(P) \phi(Q)$ , a z prawdopodobieństwem  $(1-p)$  przyjmuje wartość  $\psi(Q)$ .

- Punkt brzegowy  $Q$  sąsiaduje tylko z jednym punktem wewnętrznym  $P$  – c.d.

Reguła błędzenia przypadkowego:

1. Cząsteczce  $X$  startującej z punktu wewnętrznego  $(x, y)$  przypisujemy wagę  $W = 1$ .
2. Jeżeli cząsteczka  $X$  znajdzie się w chwili  $t$  w punkcie brzegowym  $Q$ , to z prawdopodobieństwem  $p$  wraca do  $P$  i otrzymuje nową wagę równą  $W\phi(Q)$  lub z prawdopodobieństwem  $(1 - p)$  kończy błędzenie w punkcie  $Q$  i otrzymuje wagę  $W\psi(Q)$ .
3. Każdej trajektorii przypisujemy wartość równą wadze cząsteczki w chwili zakończenia błędzenia. To znaczy, że trajektorii, która zakończyła się w punkcie  $Q$ , a przedtem przechodziła przez punkty brzegowe  $Q^{(1)}, Q^{(2)}, \dots, Q^{(\nu)}$  sąsiadujące tylko z pojedynczym punktem wewnętrznym przypiszemy wartość:

$$\phi(Q^{(1)}) \phi(Q^{(2)}) \dots \phi(Q^{(\nu)}) \psi(Q).$$

- ▷ W ogólnym przypadku obliczenie pochodnej wzdłuż normalnej jest bardziej skomplikowane.



## Ogólniejsze warunki brzegowe

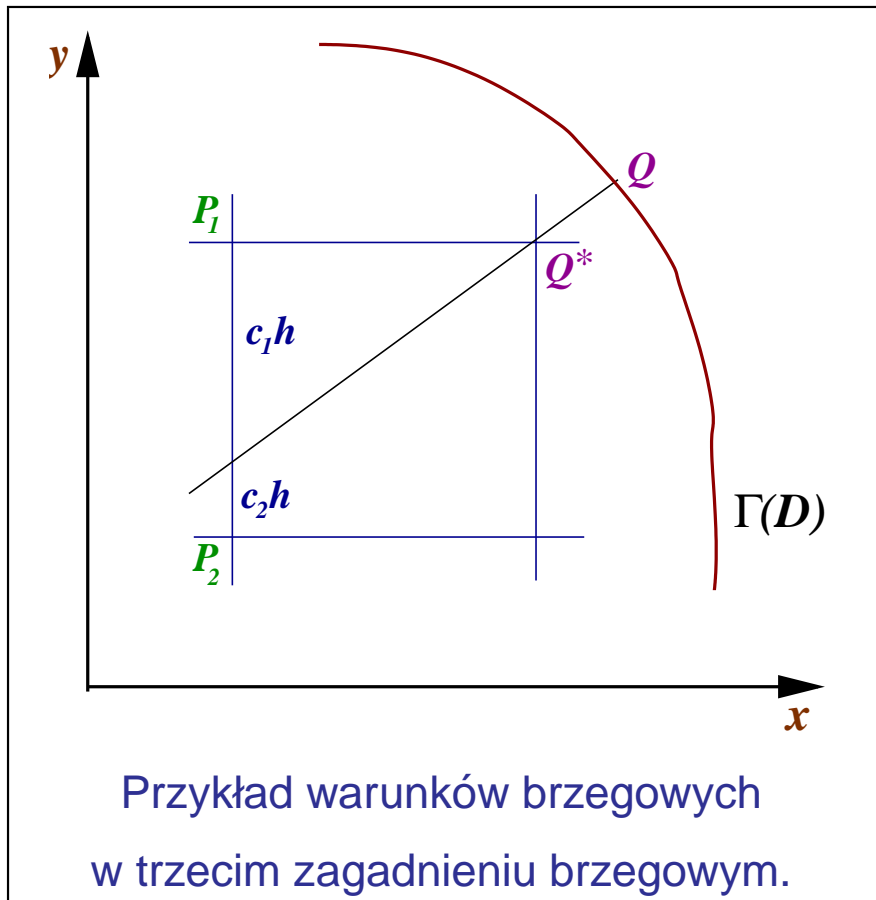

► Warunki brzegowe w postaci różnicowej:

$$f(Q) \frac{1}{h\sqrt{1+c_1^2}} [c_2 u(P_1) + c_1 u(P_2) - u(Q^*)] + g(Q) u(Q^*) = h(Q).$$

▷ Wprowadzając oznaczenia:

$$\phi_1(Q^*) = \frac{c_1 f(Q)}{p_1 [f(Q) - h\sqrt{1+c_1^2} g(Q)]},$$

$$\phi_2(Q^*) = \frac{c_2 f(Q)}{p_2 [f(Q) - h\sqrt{1+c_1^2} g(Q)]},$$

$$\psi(Q^*) = -h \frac{\sqrt{1+c_2^2} h(Q)}{p_3 [f(Q) - h\sqrt{1+c_1^2} g(Q)]},$$

otrzymujemy:

$$u(Q^*) = p_1 \phi_1(Q^*) u(P_1) + p_2 \phi_2(Q^*) u(P_2) + p_3 \psi(Q^*),$$

gdzie liczby  $p_1, p_2, p_3$  są dobrane tak, aby mogły być interpretowane jako prawdopodobieństwa, tzn. są dodatnie i  $p_1 + p_2 + p_3 = 1$ .

## Ogólniejsze warunki brzegowe – c.d.

Reguła błądzenia przypadkowego:

1. Cząsteczce  $X$  startującej z punktu wewnętrznego  $(x, y)$  przypisujemy wagę  $W = 1$ .
  2. Jeżeli cząsteczka  $X$  znajdzie się w chwili  $t$  w punkcie brzegowym  $Q^*$ , to:
    - z prawdopodobieństwem  $p_1$  przechodzi do  $P_1$  i zmienia swoją wagę na  $W\phi_1(Q^*)$ ,
    - z prawdopodobieństwem  $p_2$  przechodzi do  $P_2$  i zmienia swoją wagę na  $W\phi_2(Q^*)$  lub
    - z prawdopodobieństwem  $p_3$  kończy błądzenie w punkcie  $Q^*$  i otrzymuje wagę  $W\psi(Q^*)$ .
  3. Każdej trajektorii przypisujemy wartość równą wadze cząsteczki w chwili zakończenia błądzenia.
- ▷ W szczególnych przypadkach powyższa procedura może ulec znacznemu uproszczeniu  
→ patrz przykład poniżej.

## Przykład:

- Obszar prostokątny:

$$D = \{(x, y) : 0 \leq x \leq a, 0 \leq y \leq b\}.$$

- Warunki brzegowe:

$$\frac{\partial u}{\partial n} = 0 \text{ dla } y = 0;$$

$$\frac{\partial u}{\partial n} = g(x, y) \text{ dla } y = b;$$

$$u(x, y) = f(x, y) \text{ dla } x = 0 \text{ oraz } x = a,$$

gdzie funkcje  $f$  i  $g$  są dane.

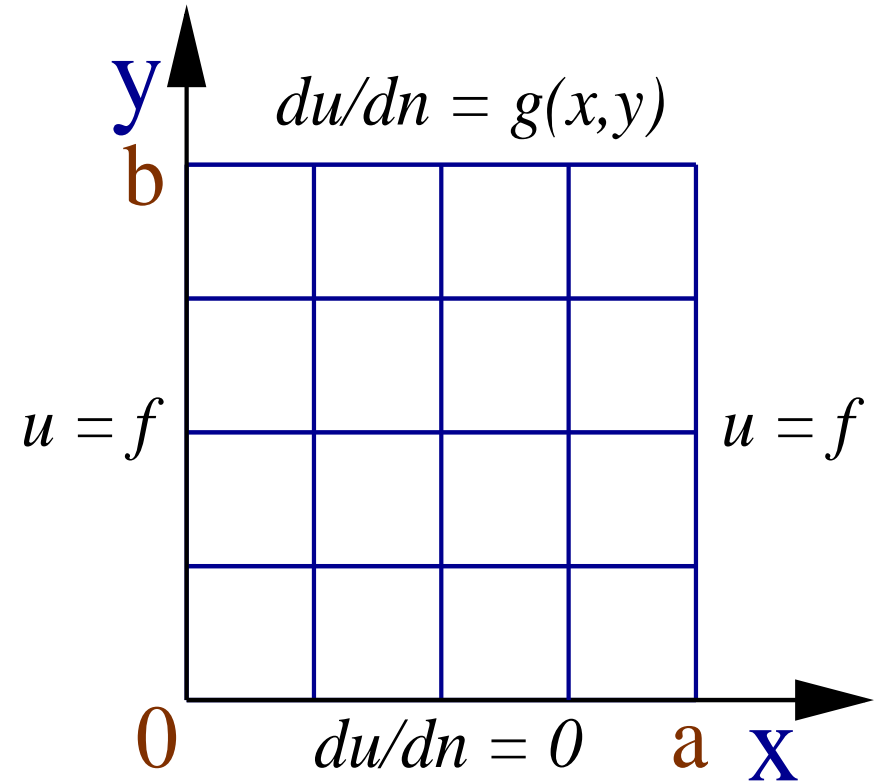

- Szukamy rozwiązania  $u$  równania Laplace'a w punkcie  $(x, y)$  wewnątrz obszaru  $D$ .

## Schemat błędzenia przypadkowego:

1. Umieszczamy cząsteczkę w punkcie  $(x, y)$  wewnątrz obszaru  $D$ , przypisujemy jej **wagę** 0.
2. Jeżeli cząsteczka jest w punkcie wewnętrznym, to z jednakowym prawdopodobieństwem przechodzi do jednego z punktów sąsiednich.
3. Jeżeli cząsteczka znajdzie się na brzegu  $y = 0$ , to jej zachowanie określone jest przez równanie różnicowe

$$u(x, 1) - u(x, 0) = 0,$$

które jest odpowiednikiem warunku brzegowego  $\partial u / \partial n = 0$ . Oznacza to, że z punktu  $(x, 0)$ , cząsteczka przechodzi z powrotem („odbija się”) do punktu  $(x, 1)$ .

4. Gdy cząsteczka znajdzie się w punkcie  $(x, b)$ , to zgodnie z warunkiem brzegowym:

$$u(x, b) = u(x, b - 1) + g(x, y),$$

w następnej chwili znajdzie się w punkcie  $(x, b - 1)$  i jej **waga** zostanie zwiększona o  $g(x, b)$ .

5. Jeżeli cząsteczka osiągnie brzeg  $x = 0$  lub  $x = a$ , to jej błędzenie zostanie **zakończone** i jej **waga** zostanie zwiększona o wartość funkcji  $f$  w tym punkcie brzegowym.

▷ **Waga ta zostaje przypisana danej trajektorii jako wartość badanej zmiennej losowej.**

- W tym schemacie punkty  $(x, 0)$  i  $(x, b)$  zachowują się jak ekrany odbijające, natomiast punkty  $(0, y)$  i  $(a, y)$  – jak ekrany pochłaniające.
